# Supplementary material
Source: PubMed Central journal article supplement (PMC3348680)
Supplement: ct200876v_si_001.pdf [file ct200876v_si_001.pdf]

**Supporting Information for  
Improving Internal Peptide Dynamics in the Coarse-Grained MARTINI Model: Towards  
Large-Scale Simulations of Amyloid-like and Elastin-like Peptides**

Mikyung Seo<sup>†</sup>, Sarah Raucher<sup>‡</sup>, Régis Pomès<sup>‡</sup>, and D. Peter Tieleman<sup>\*†</sup>

<sup>†</sup>Department of Biological Sciences and Institute for Biocomplexity and Informatics, University of Calgary, Calgary, Alberta,  
<sup>‡</sup>Canada Molecular Structure and Function, Hospital for Sick Children and Department of Biochemistry, University of Toronto,  
Toronto, Ontario, Canada

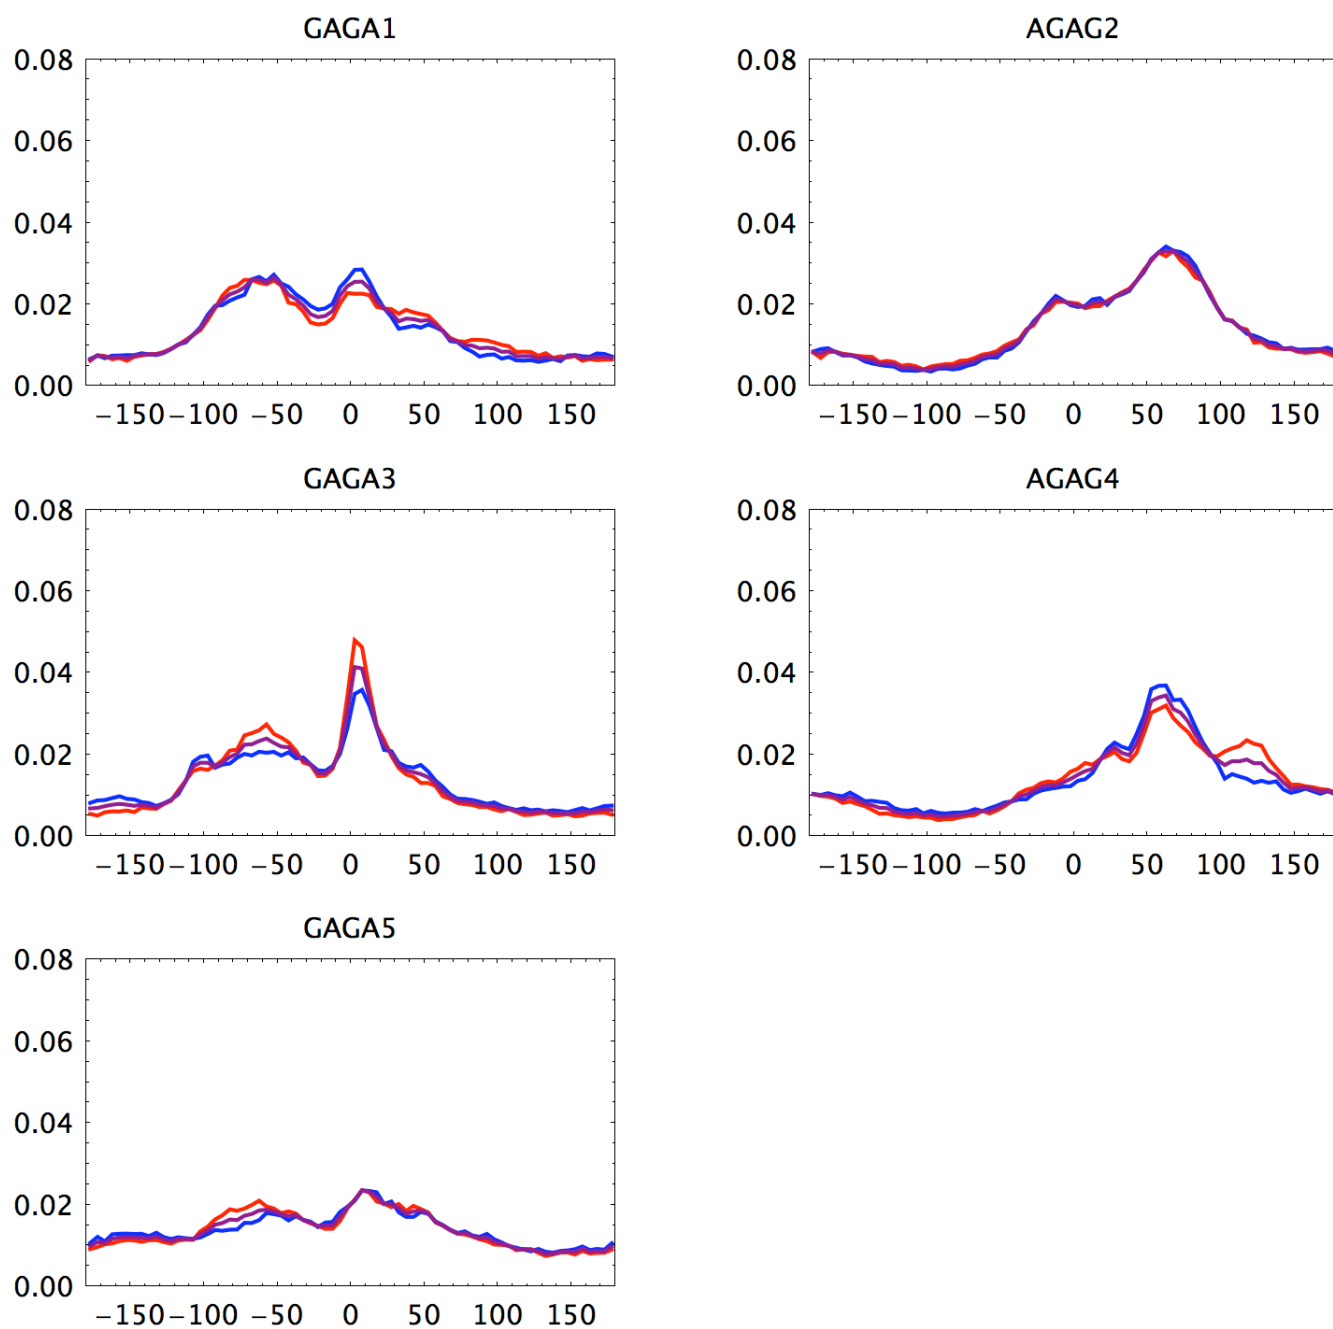

**Figure S11.** Backbone dihedral angle probability distributions  $P(\psi)$  for  $(GA)_4$  from atomistic simulations. X-axis represents dihedral angle,  $\psi$  in deg. The probability distribution of the dihedral angle is computed for the first half (blue), the second half (red), and the complete trajectory (purple).

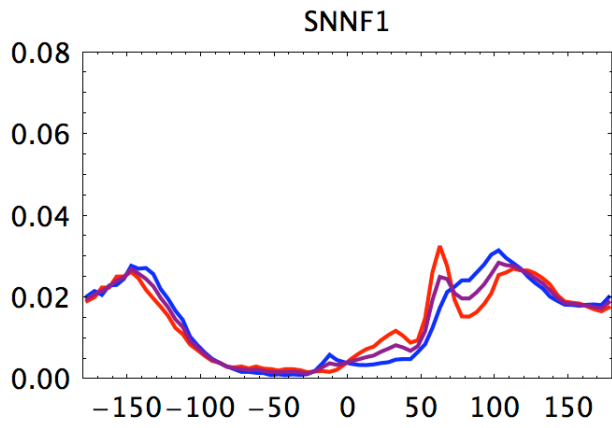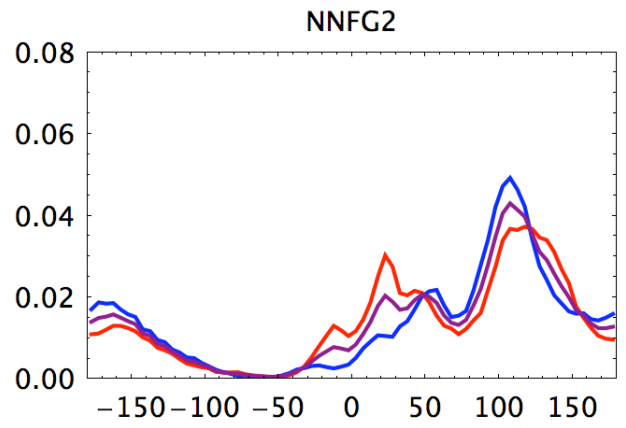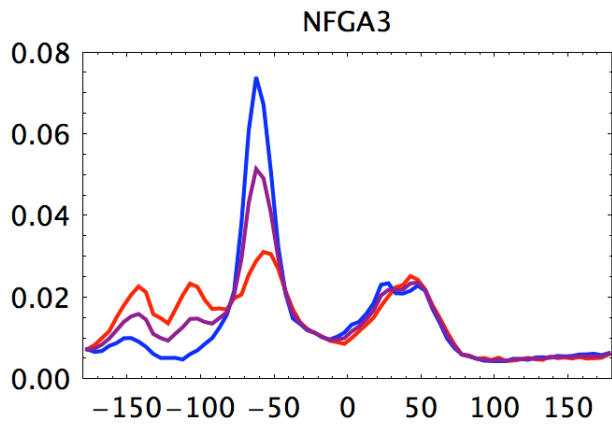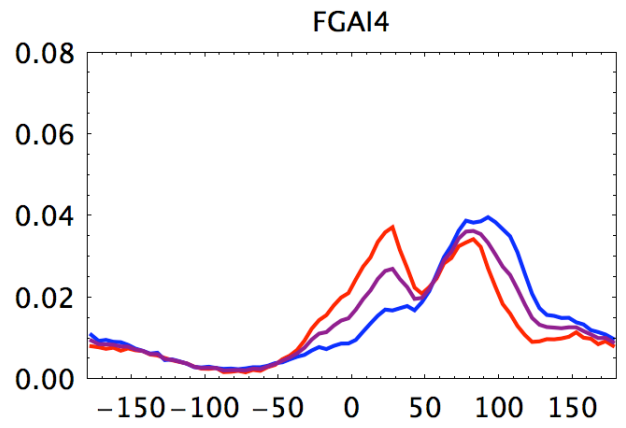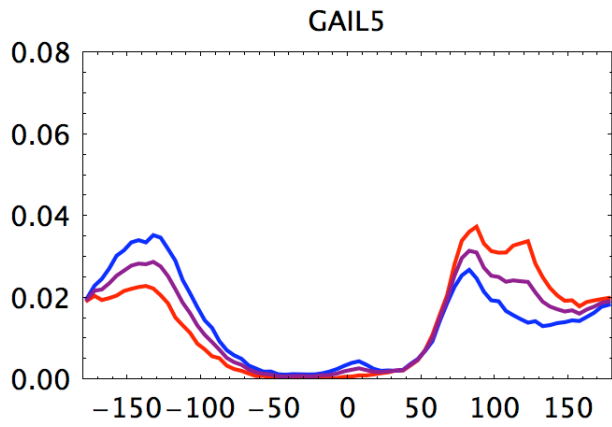

Figure SII. (Continued)  $P(\psi)$  for SNNFGAIL.

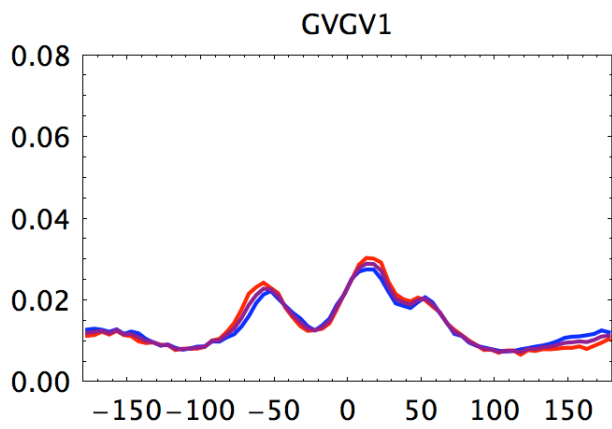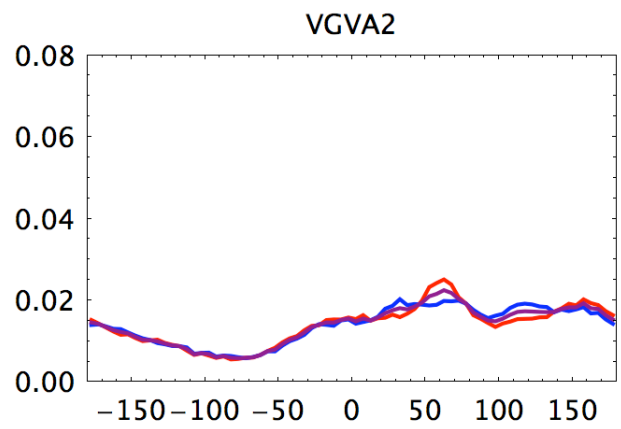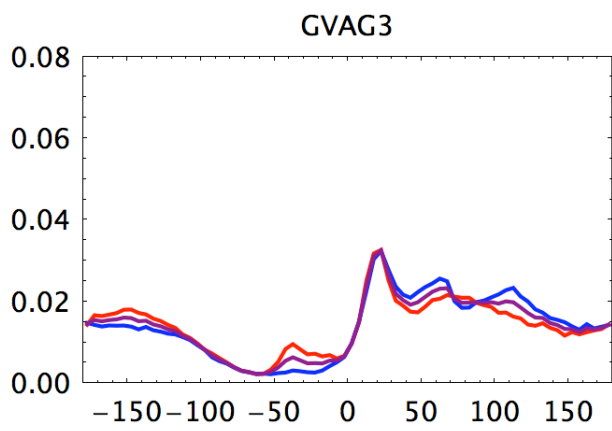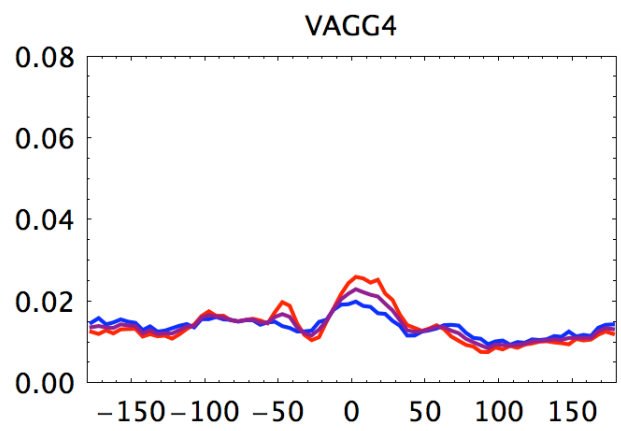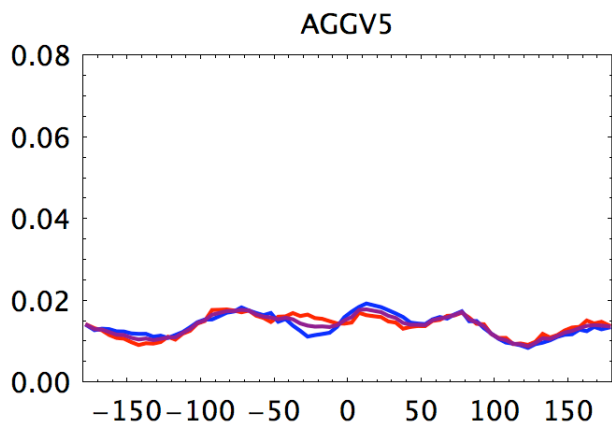

**Figure S11.** (Continued)  $P(\psi)$  for GVG VAGGV.

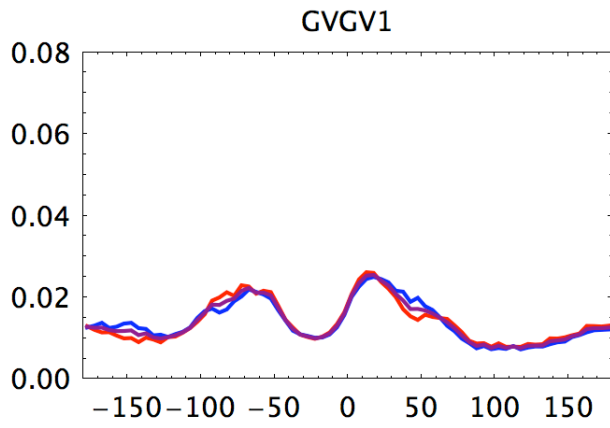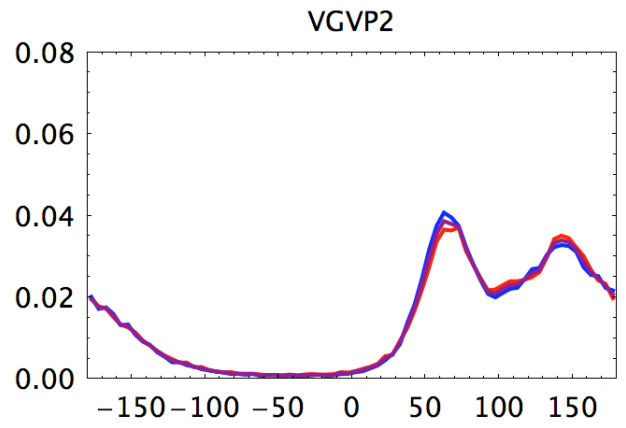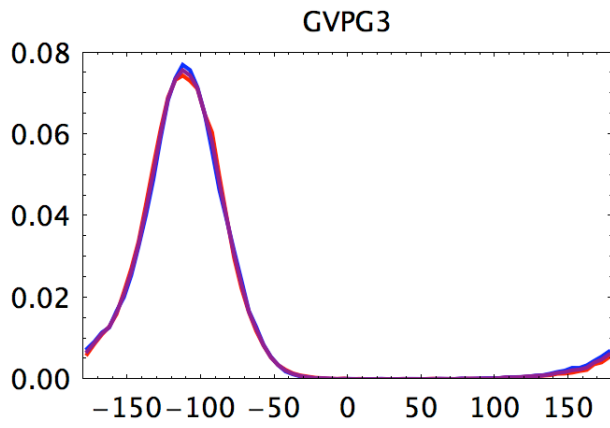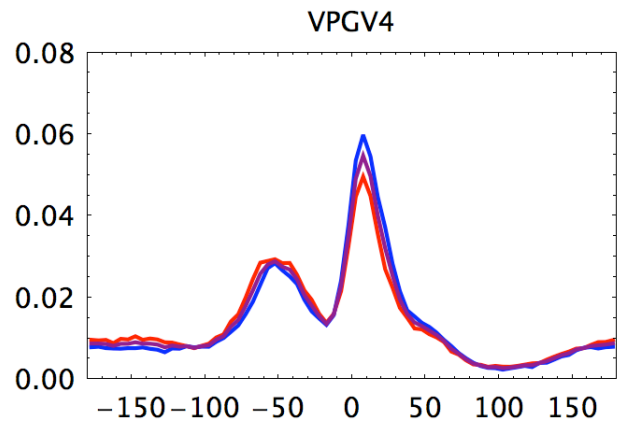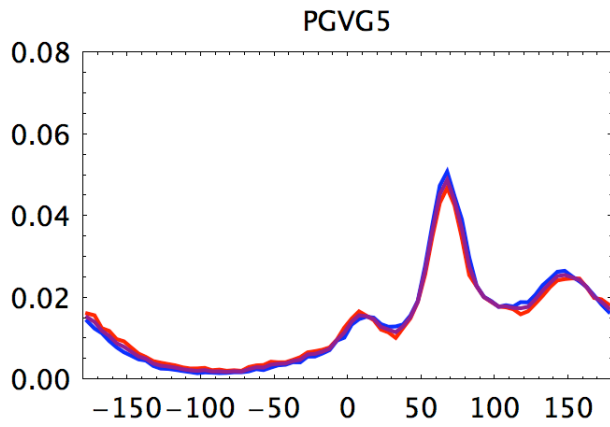

**Figure SII.** (Continued)  $P(\psi)$  for GVGVPGVG.

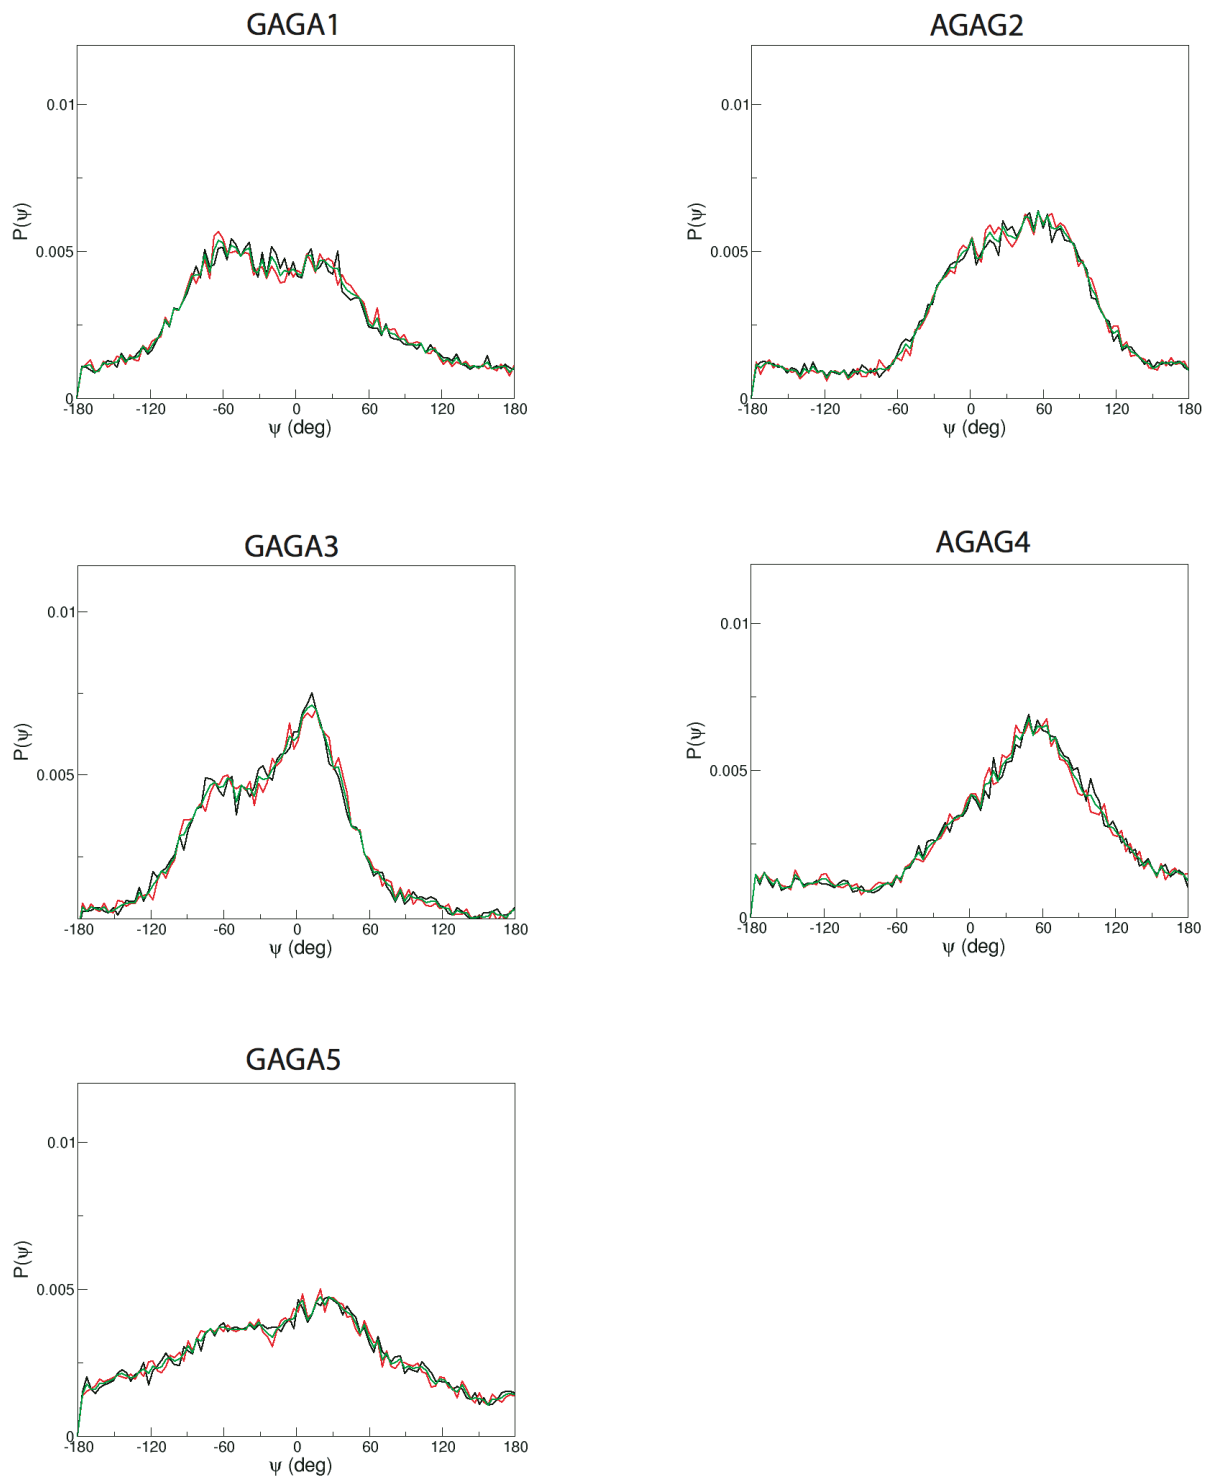

**Figure S12.** Backbone dihedral angle probability distributions  $P(\psi)$  for  $(GA)_4$  from CG simulations. The probability distribution of the dihedral angle is computed for the first half (black), the second half (red), and the complete trajectory (green).

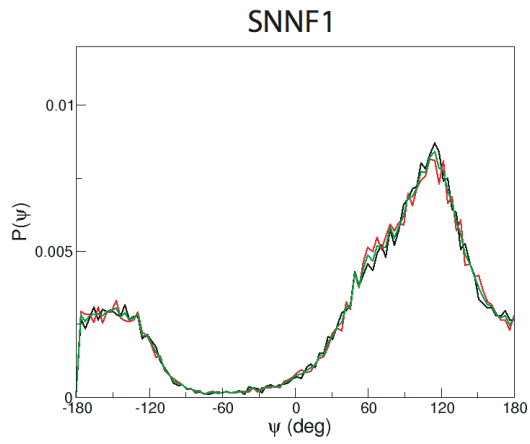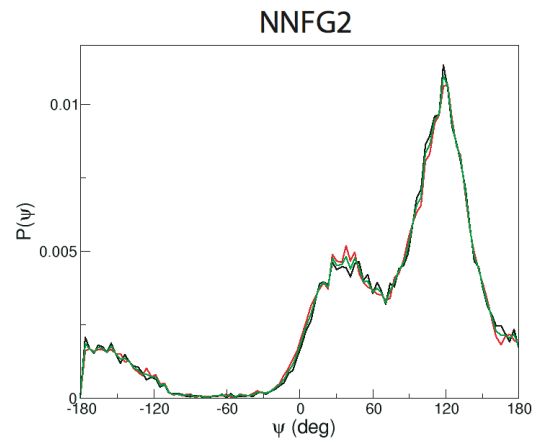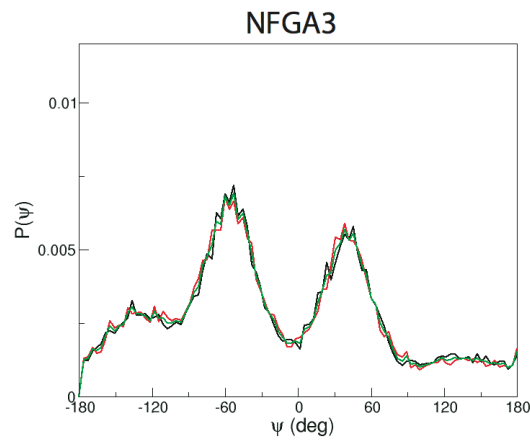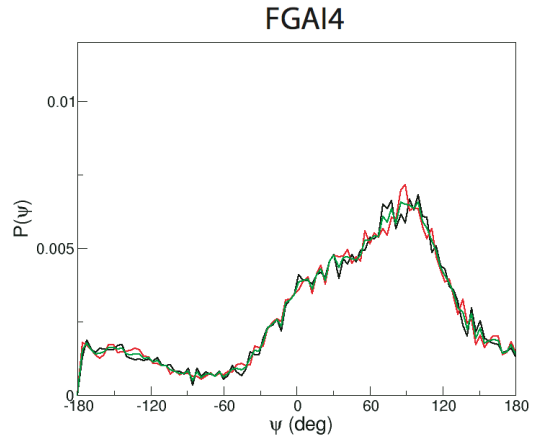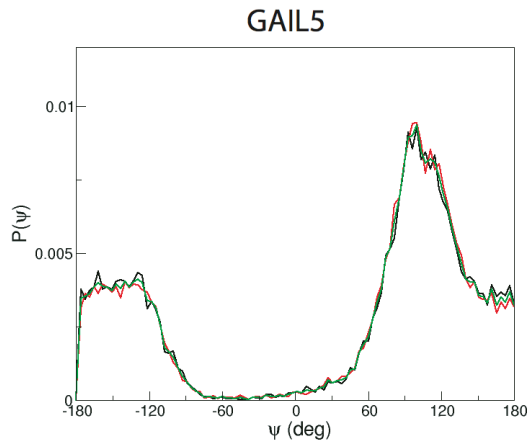

**Figure SI2.** (Continued)  $P(\psi)$  for SNNFGAIL.

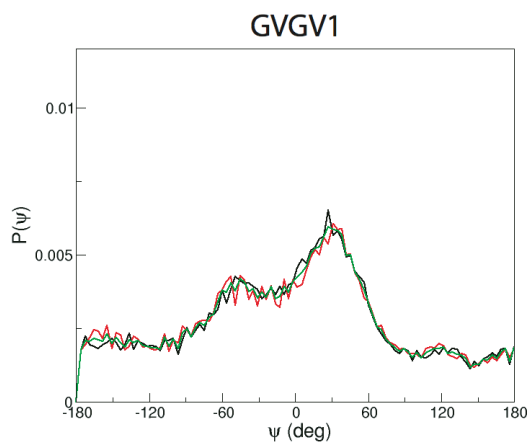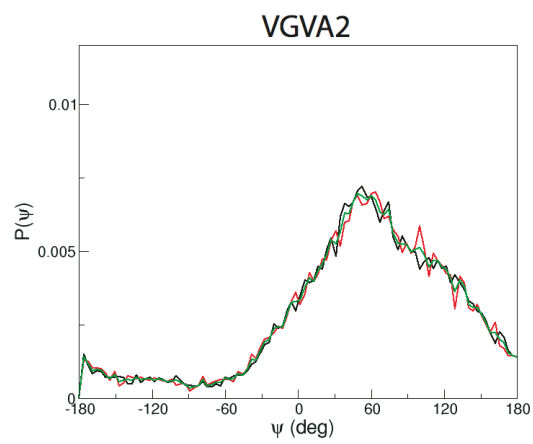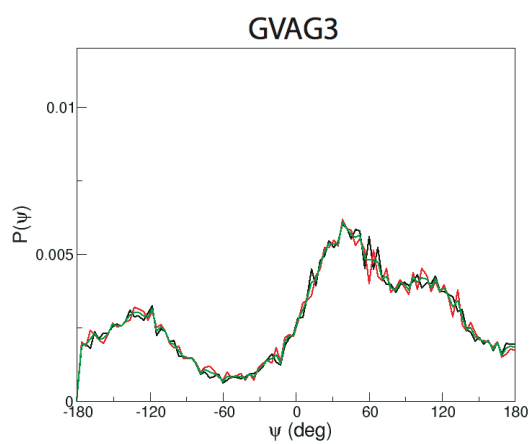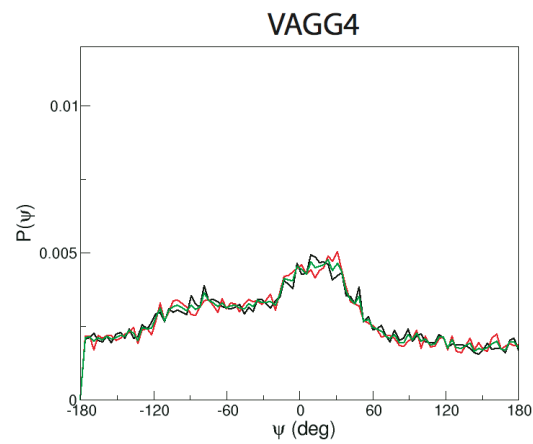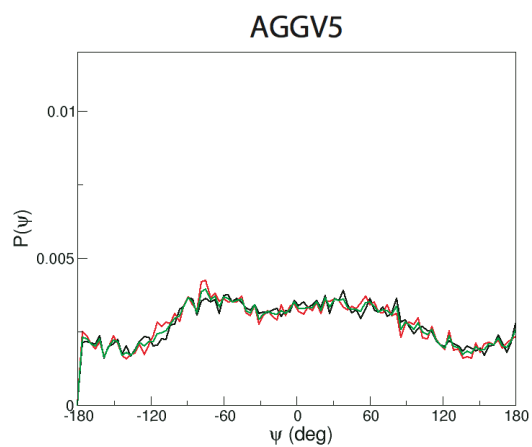

**Figure SI2.** (Continued)  $P(\psi)$  for GVGVAGGV.



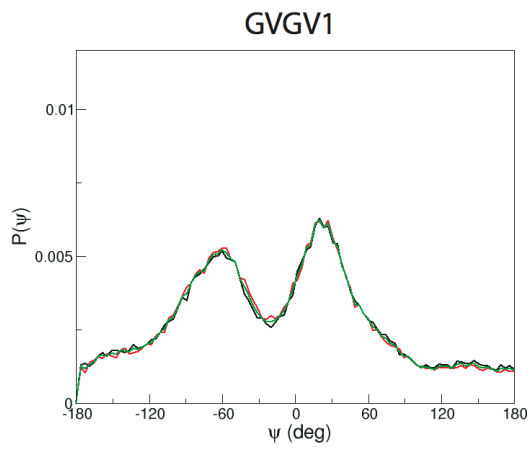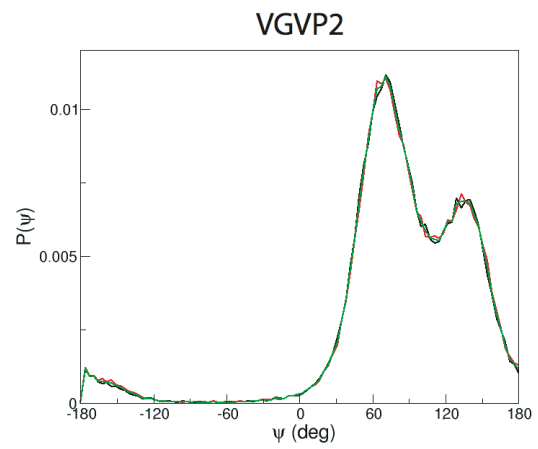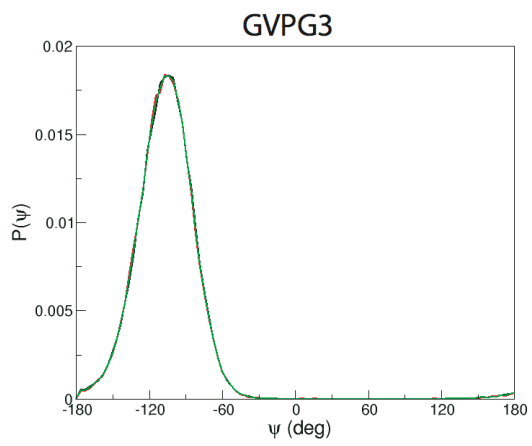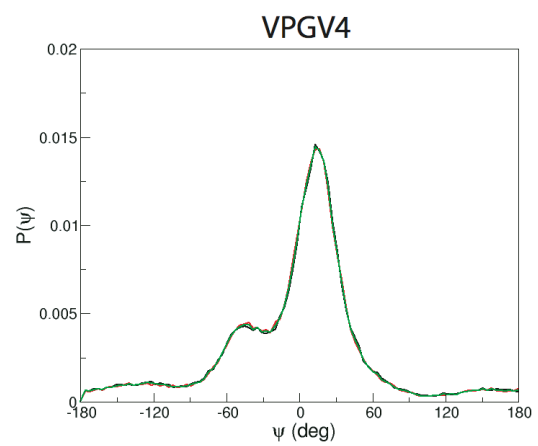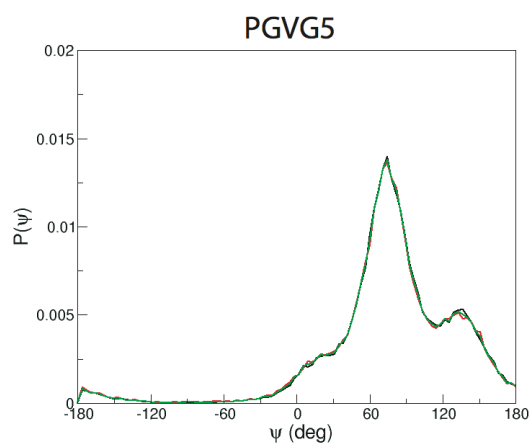

**Figure SI2.** (Continued)  $P(\psi)$  for GVGVPGVG.

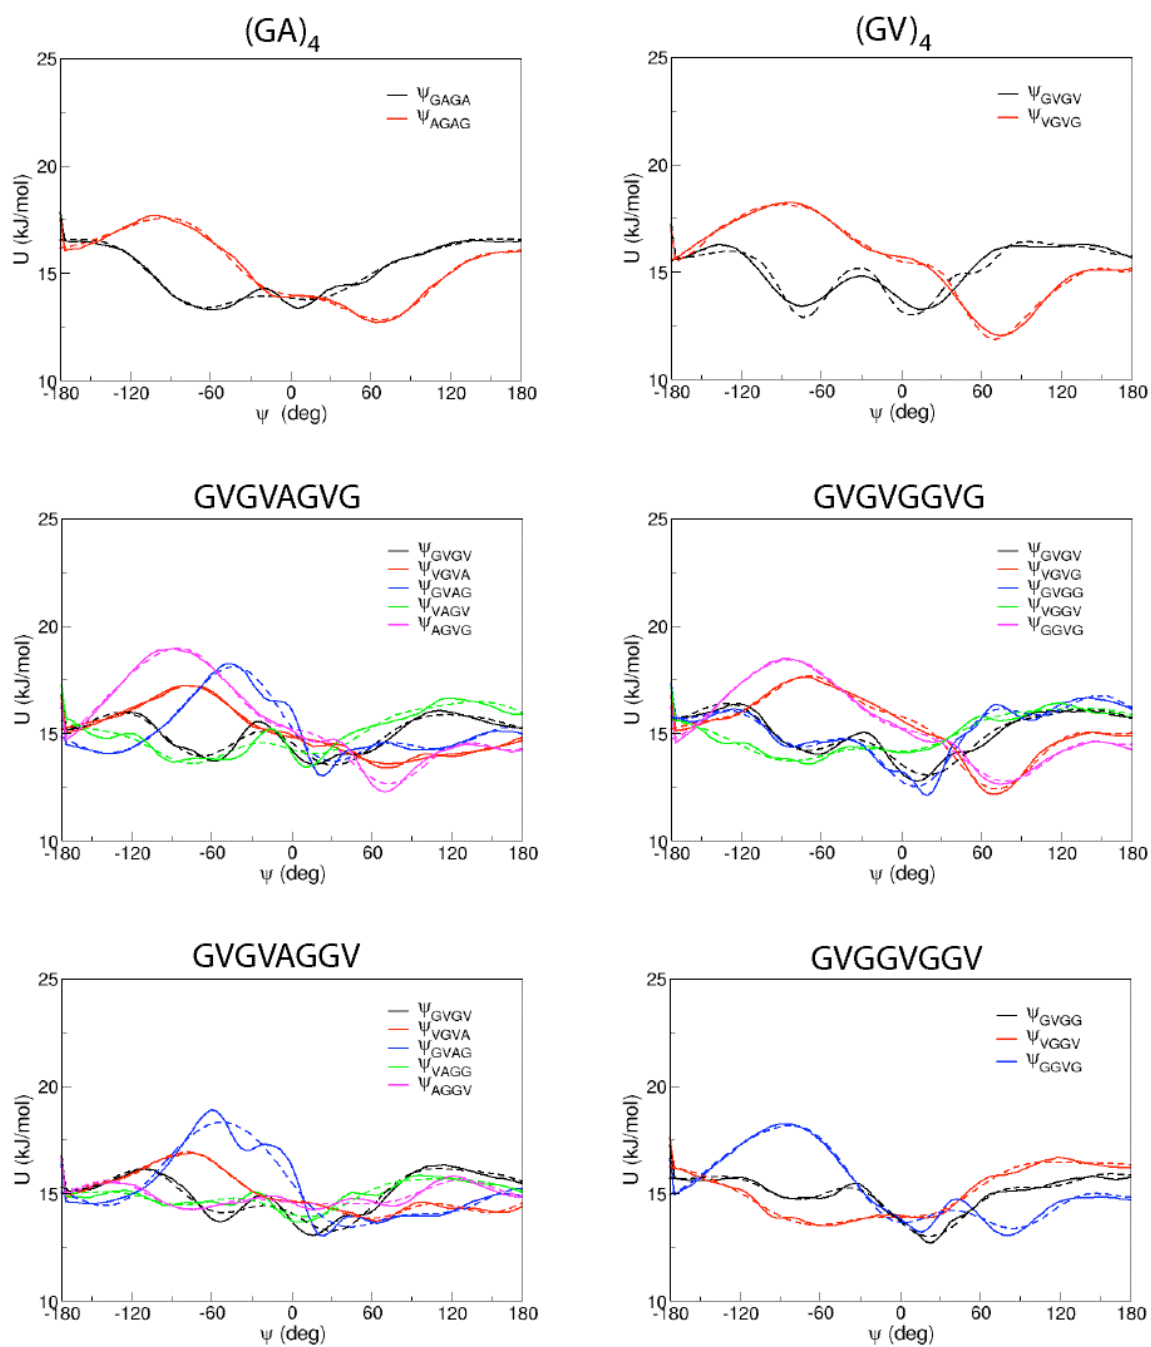

**Figure SI3.** The potentials of mean force (solid lines) and fitting energy functions (dotted lines) for all possible backbone dihedral angles of octapeptides. The potentials of mean force were extracted from the probability distributions of the dihedral angles calculated from atomistic trajectories.

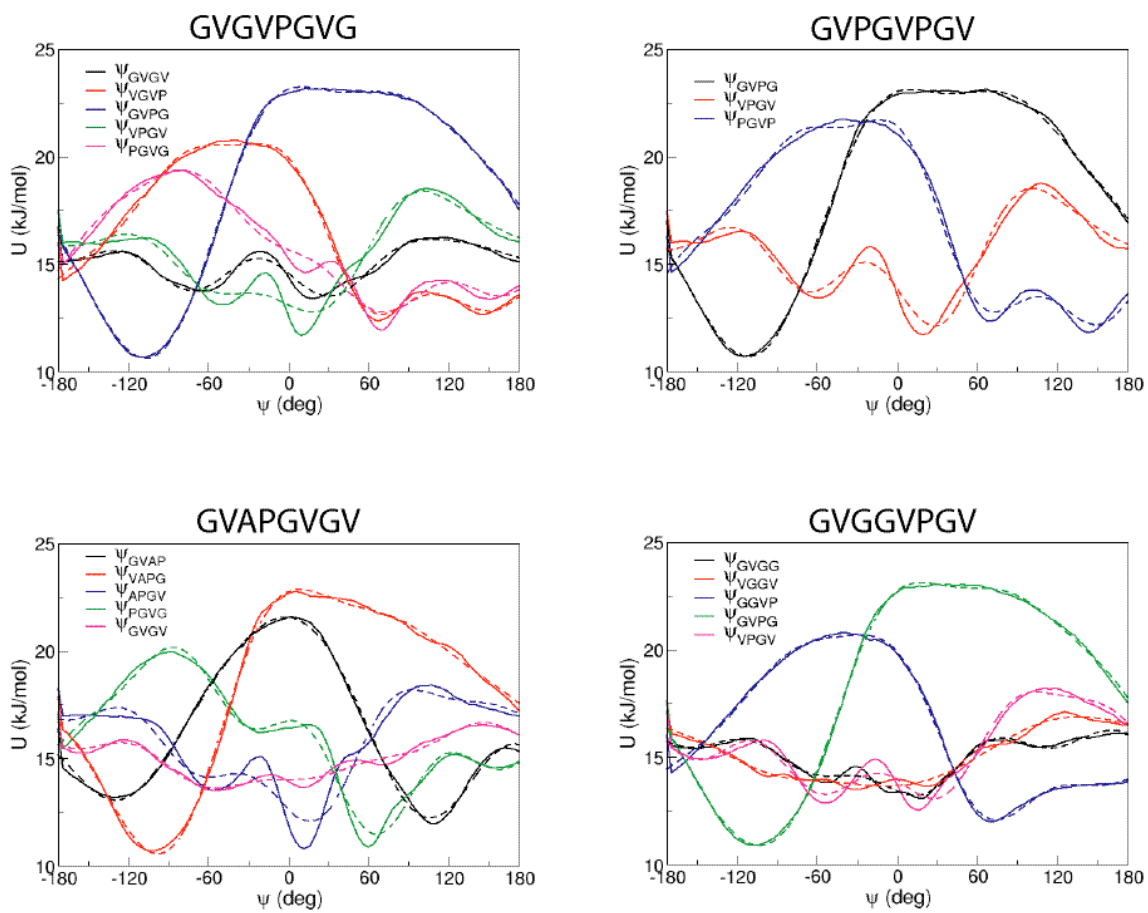

Figure SI3. Continued.

**Table SII.** Derived dihedral CG parameters for tetrapeptides (Eq. 6 of the main document).  
 $K_i$  is given in  $\text{kJ mol}^{-1} \text{nm}^{-2}$  and  $\phi_i$  in deg.  $n_i$  is multiplicity.

| i | $\phi_i$      | $K_i$     | $n_i$ | $\phi_i$      | $K_i$     | $n_i$ |
|---|---------------|-----------|-------|---------------|-----------|-------|
|   | $\Psi_{AGAG}$ |           |       | $\Psi_{AGGV}$ |           |       |
| 0 | 0.000000      | -0.107029 | 1     | 0.000000      | -0.387198 | 1     |
| 1 | 0.000000      | -0.240789 | 2     | 0.000000      | 0.141459  | 2     |
| 2 | 0.000000      | -0.045847 | 3     | 0.000000      | 0.123831  | 3     |
| 3 | 0.000000      | 0.088616  | 4     | 0.000000      | 0.116407  | 4     |
| 4 | 90.000000     | -2.259989 | 1     | 90.000000     | 0.323073  | 1     |
| 5 | 90.000000     | -0.293574 | 2     | 90.000000     | -0.172202 | 2     |
| 6 | 90.000000     | 0.371547  | 3     | 90.000000     | -0.113024 | 3     |
| 7 | 90.000000     | 0.303240  | 4     | 90.000000     | -0.079454 | 4     |
| 8 | 90.000000     | 17.612248 | 0     | 90.000000     | 14.999226 | 0     |
|   | $\Psi_{AGVG}$ |           |       | $\Psi_{APGV}$ |           |       |
| 0 | 0.000000      | 0.612189  | 1     | 0.000000      | -1.557552 | 1     |
| 1 | 0.000000      | -0.489914 | 2     | 0.000000      | -0.454846 | 2     |
| 2 | 0.000000      | 0.140617  | 3     | 0.000000      | 0.390049  | 3     |
| 3 | 0.000000      | 0.129995  | 4     | 0.000000      | 0.345011  | 4     |
| 4 | 90.000000     | -2.648496 | 1     | 90.000000     | 1.056192  | 1     |
| 5 | 90.000000     | -0.026237 | 2     | 90.000000     | -0.667619 | 2     |
| 6 | 90.000000     | 0.391829  | 3     | 90.000000     | -0.026963 | 3     |
| 7 | 90.000000     | 0.220901  | 4     | 90.000000     | -0.294953 | 4     |
| 8 | 90.000000     | 17.305153 | 0     | 90.000000     | 16.540000 | 0     |
|   | $\Psi_{FGAI}$ |           |       | $\Psi_{GAGA}$ |           |       |
| 0 | 0.000000      | 0.282397  | 1     | 0.000000      | -1.140736 | 1     |
| 1 | 0.000000      | -0.093562 | 2     | 0.000000      | -0.017667 | 2     |
| 2 | 0.000000      | 0.184967  | 3     | 0.000000      | 0.088631  | 3     |
| 3 | 0.000000      | 0.110376  | 4     | 0.000000      | 0.196805  | 4     |
| 4 | 90.000000     | -2.826619 | 1     | 90.000000     | 0.336172  | 1     |
| 5 | 90.000000     | -0.976492 | 2     | 90.000000     | -0.279399 | 2     |
| 6 | 90.000000     | 0.187278  | 3     | 90.000000     | -0.100757 | 3     |
| 7 | 90.000000     | 0.117143  | 4     | 90.000000     | -0.306441 | 4     |
| 8 | 90.000000     | 18.778401 | 0     | 90.000000     | 16.281485 | 0     |
|   | $\Psi_{GAIL}$ |           |       | $\Psi_{GGVP}$ |           |       |
| 0 | 0.000000      | 3.039320  | 1     | 0.000000      | 2.471758  | 1     |
| 1 | 0.000000      | 0.954368  | 2     | 0.000000      | 0.510827  | 2     |
| 2 | 0.000000      | -0.371006 | 3     | 0.000000      | 0.569905  | 3     |
| 3 | 0.000000      | -0.271769 | 4     | 0.000000      | 0.231177  | 4     |
| 4 | 90.000000     | -1.915955 | 1     | 90.000000     | -2.905913 | 1     |
| 5 | 90.000000     | -1.599522 | 2     | 90.000000     | -1.108903 | 2     |
| 6 | 90.000000     | 0.289154  | 3     | 90.000000     | 0.184505  | 3     |
| 7 | 90.000000     | 0.142438  | 4     | 90.000000     | 0.395382  | 4     |
| 8 | 90.000000     | 15.960449 | 0     | 90.000000     | 15.963075 | 0     |

Table S11. Continued.

| i | $\phi_i$             | $K_i$     | $n_i$ | $\phi_i$             | $K_i$     | $n_i$ |
|---|----------------------|-----------|-------|----------------------|-----------|-------|
|   | $\Psi_{\text{GVAG}}$ |           |       | $\Psi_{\text{GVAP}}$ |           |       |
| 0 | 0.000000             | 0.976996  | 1     | 0.000000             | 3.482771  | 1     |
| 1 | 0.000000             | 0.050850  | 2     | 0.000000             | 2.147892  | 2     |
| 2 | 0.000000             | -0.756830 | 3     | 0.000000             | -0.125944 | 3     |
| 3 | 0.000000             | 0.168020  | 4     | 0.000000             | 0.074559  | 4     |
| 4 | 90.000000            | -0.850899 | 1     | 90.000000            | -0.329573 | 1     |
| 5 | 90.000000            | -0.796810 | 2     | 90.000000            | -1.029307 | 2     |
| 6 | 90.000000            | 0.231184  | 3     | 90.000000            | 0.557539  | 3     |
| 7 | 90.000000            | 0.182909  | 4     | 90.000000            | 0.140045  | 4     |
| 8 | 90.000000            | 15.983796 | 0     | 90.000000            | 11.323095 | 0     |
|   | $\Psi_{\text{GVGG}}$ |           |       | $\Psi_{\text{GVGV}}$ |           |       |
| 0 | 0.000000             | -0.402009 | 1     | 0.000000             | -0.185406 | 1     |
| 1 | 0.000000             | 0.021694  | 2     | 0.000000             | -0.184531 | 2     |
| 2 | 0.000000             | -0.165141 | 3     | 0.000000             | 0.042111  | 3     |
| 3 | 0.000000             | 0.011021  | 4     | 0.000000             | 0.055186  | 4     |
| 4 | 90.000000            | 0.114472  | 1     | 90.000000            | 0.195645  | 1     |
| 5 | 90.000000            | -0.256438 | 2     | 90.000000            | -0.530603 | 2     |
| 6 | 90.000000            | 0.141132  | 3     | 90.000000            | -0.033636 | 3     |
| 7 | 90.000000            | -0.393561 | 4     | 90.000000            | -0.312372 | 4     |
| 8 | 90.000000            | 15.886439 | 0     | 90.000000            | 15.953331 | 0     |
|   | $\Psi_{\text{GVPG}}$ |           |       | $\Psi_{\text{NFGA}}$ |           |       |
| 0 | 0.000000             | 3.404023  | 1     | 0.000000             | -0.636232 | 1     |
| 1 | 0.000000             | 1.517194  | 2     | 0.000000             | 0.062710  | 2     |
| 2 | 0.000000             | -0.151486 | 3     | 0.000000             | -0.007445 | 3     |
| 3 | 0.000000             | 0.003505  | 4     | 0.000000             | 0.445799  | 4     |
| 4 | 90.000000            | 4.898950  | 1     | 90.000000            | -0.016874 | 1     |
| 5 | 90.000000            | -1.246595 | 2     | 90.000000            | -0.232684 | 2     |
| 6 | 90.000000            | -0.587647 | 3     | 90.000000            | 0.014639  | 3     |
| 7 | 90.000000            | -0.123101 | 4     | 90.000000            | -0.221027 | 4     |
| 8 | 90.000000            | 10.868441 | 0     | 90.000000            | 15.560684 | 0     |
|   | $\Psi_{\text{NNFG}}$ |           |       | $\Psi_{\text{PGVG}}$ |           |       |
| 0 | 0.000000             | 1.858642  | 1     | 0.000000             | 0.746513  | 1     |
| 1 | 0.000000             | -0.139087 | 2     | 0.000000             | -0.332803 | 2     |
| 2 | 0.000000             | -0.874251 | 3     | 0.000000             | 0.046517  | 3     |
| 3 | 0.000000             | 0.186661  | 4     | 0.000000             | 0.105136  | 4     |
| 4 | 90.000000            | -3.303938 | 1     | 90.000000            | -2.617351 | 1     |
| 5 | 90.000000            | -1.135280 | 2     | 90.000000            | -0.161660 | 2     |
| 6 | 90.000000            | -0.048363 | 3     | 90.000000            | 0.468383  | 3     |
| 7 | 90.000000            | -0.168022 | 4     | 90.000000            | 0.259117  | 4     |
| 8 | 90.000000            | 19.774256 | 0     | 90.000000            | 17.127026 | 0     |

Table S11. Continued.

| i | $\phi_i$      | $K_i$     | $n_i$ | $\phi_i$      | $K_i$     | $n_i$ |
|---|---------------|-----------|-------|---------------|-----------|-------|
|   | $\Psi_{PGVP}$ |           |       | $\Psi_{SNNF}$ |           |       |
| 0 | 0.000000      | 2.815029  | 1     | 0.000000      | 3.810278  | 1     |
| 1 | 0.000000      | 0.426129  | 2     | 0.000000      | 0.682017  | 2     |
| 2 | 0.000000      | 0.674323  | 3     | 0.000000      | -0.132029 | 3     |
| 3 | 0.000000      | 0.437253  | 4     | 0.000000      | 0.210327  | 4     |
| 4 | 90.000000     | -3.080922 | 1     | 90.000000     | -1.518550 | 1     |
| 5 | 90.000000     | -0.824217 | 2     | 90.000000     | -1.398166 | 2     |
| 6 | 90.000000     | 0.014393  | 3     | 90.000000     | 0.543148  | 3     |
| 7 | 90.000000     | 0.449709  | 4     | 90.000000     | -0.004500 | 4     |
| 8 | 90.000000     | 15.593331 | 0     | 90.000000     | 14.295962 | 0     |
|   | $\Psi_{VAGV}$ |           |       | $\Psi_{VAPG}$ |           |       |
| 0 | 0.000000      | -0.714639 | 1     | 0.000000      | 3.081904  | 1     |
| 1 | 0.000000      | 0.019523  | 2     | 0.000000      | 1.800369  | 2     |
| 2 | 0.000000      | 0.099816  | 3     | 0.000000      | -0.375946 | 3     |
| 3 | 0.000000      | 0.044411  | 4     | 0.000000      | -0.092105 | 4     |
| 4 | 90.000000     | 0.374792  | 1     | 90.000000     | 4.383422  | 1     |
| 5 | 90.000000     | -0.337005 | 2     | 90.000000     | -0.976558 | 2     |
| 6 | 90.000000     | -0.001865 | 3     | 90.000000     | -0.529893 | 3     |
| 7 | 90.000000     | -0.405671 | 4     | 90.000000     | -0.049402 | 4     |
| 8 | 90.000000     | 15.933580 | 0     | 90.000000     | 10.929294 | 0     |
|   | $\Psi_{VGVG}$ |           |       | $\Psi_{VGVG}$ |           |       |
| 0 | 0.000000      | 0.405188  | 1     | 0.000000      | 0.068082  | 1     |
| 1 | 0.000000      | -0.464750 | 2     | 0.000000      | -0.459752 | 2     |
| 2 | 0.000000      | 0.131057  | 3     | 0.000000      | 0.321160  | 3     |
| 3 | 0.000000      | 0.113520  | 4     | 0.000000      | 0.138277  | 4     |
| 4 | 90.000000     | -2.498661 | 1     | 90.000000     | 4.062207  | 1     |
| 5 | 90.000000     | -0.011364 | 2     | 90.000000     | -0.070184 | 2     |
| 6 | 90.000000     | 0.480663  | 3     | 90.000000     | 0.665566  | 3     |
| 7 | 90.000000     | 0.267429  | 4     | 90.000000     | -0.418288 | 4     |
| 8 | 90.000000     | 17.134690 | 0     | 90.000000     | 12.047799 | 0     |
|   | $\Psi_{VPGV}$ |           |       |               |           |       |
| 0 | 0.000000      | -0.970742 | 1     |               |           |       |
| 1 | 0.000000      | -0.421440 | 2     |               |           |       |
| 2 | 0.000000      | 0.314365  | 3     |               |           |       |
| 3 | 0.000000      | 0.473802  | 4     |               |           |       |
| 4 | 90.000000     | 1.152995  | 1     |               |           |       |
| 5 | 90.000000     | -0.597699 | 2     |               |           |       |
| 6 | 90.000000     | -0.148852 | 3     |               |           |       |
| 7 | 90.000000     | -0.461853 | 4     |               |           |       |
| 8 | 90.000000     | 15.893715 | 0     |               |           |       |
